# Supplementary material for: The Design and Material Characterization of Reclaimed Asphalt Pavement Enriched Concrete for Construction Purposes
Source: MDPI journal article supplement (doi:10.3390/ma13214986), 2020-11-05
Supplement: s1 [file s1]

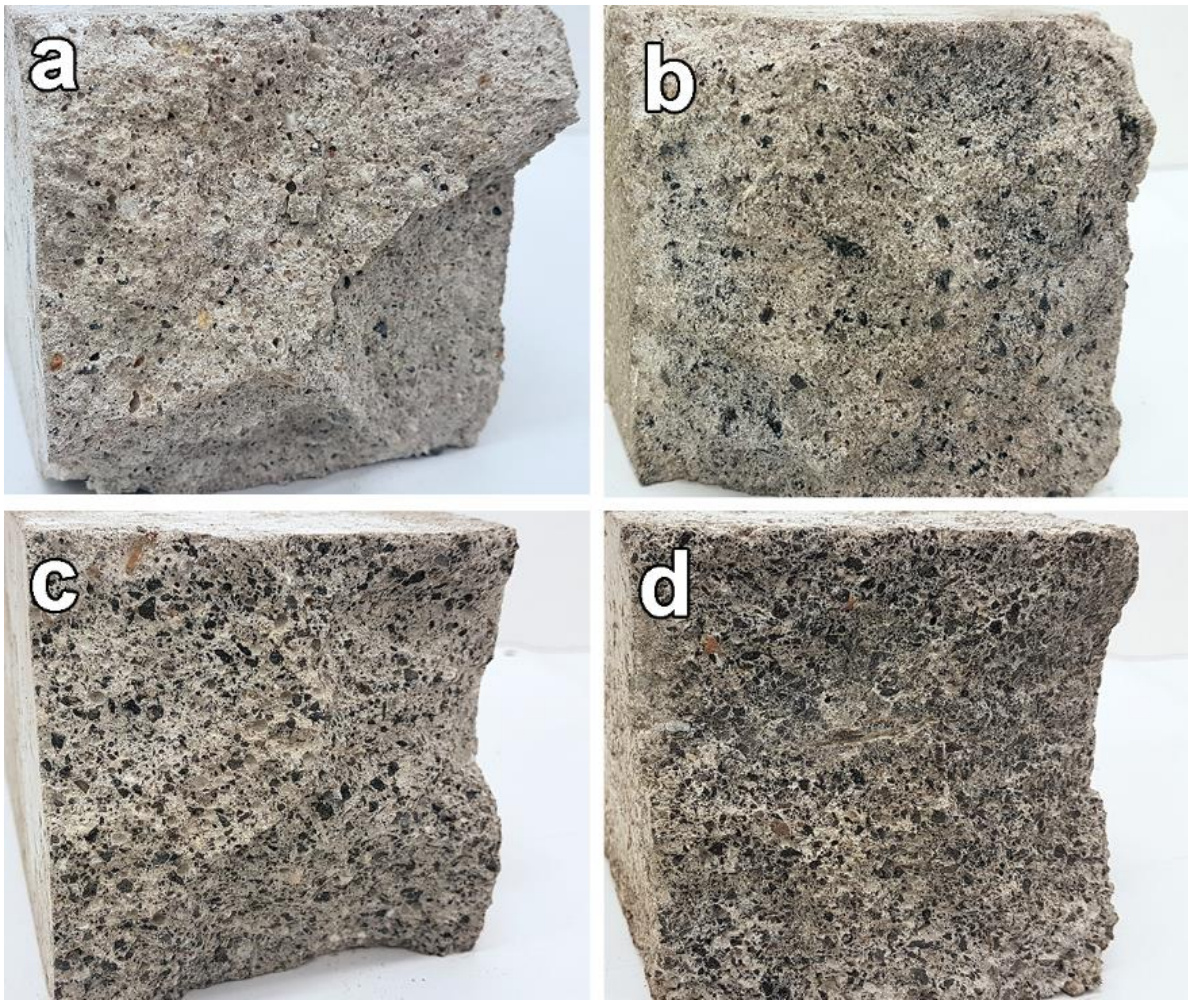

Fig. S1: The collection of prepared prismatic concrete samples with dimensions of 100 x 100 x 400 mm of after flexural strength measurements: a – RC, b – RA-C 10, c – RA-C 50, d – RA-C 100.
